# Supplementary material
Source: Springer Nature journal article supplement (https://www.springermedizin.de/resource/supplementary/12974_2010_227_MOESM2_ESM.pdf/9601036)

# 30min MCAO / 72h reperfusion

## infarct volume

## brain swelling

mixed gender

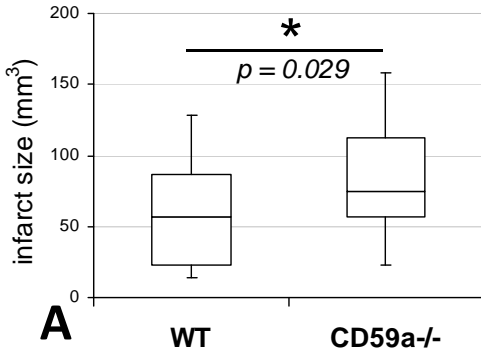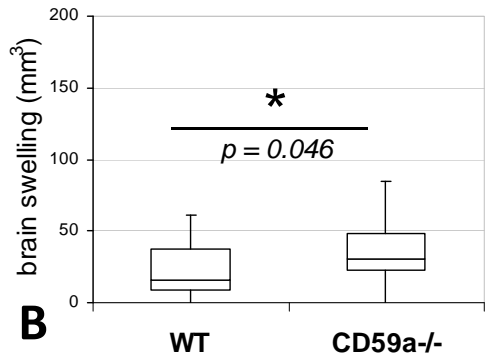

male

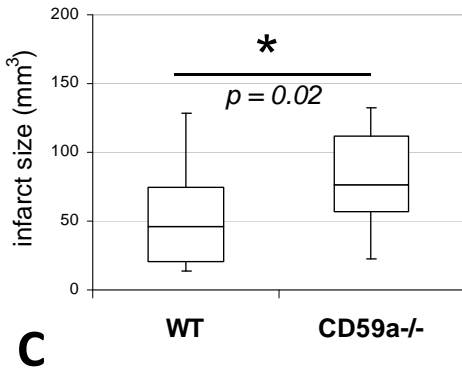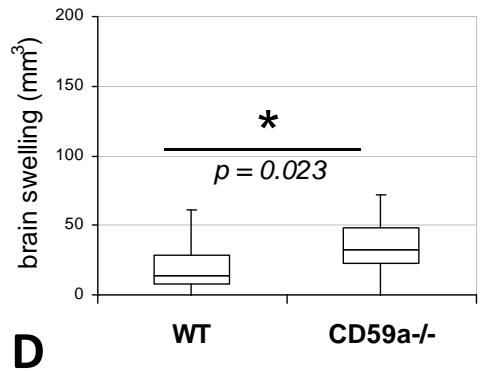

female

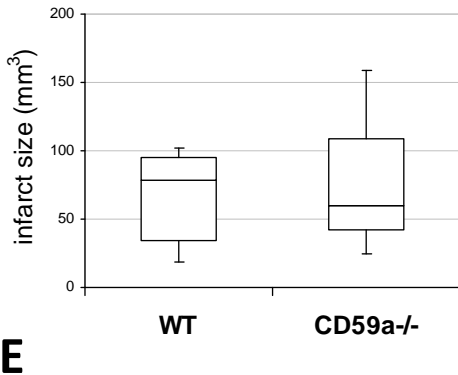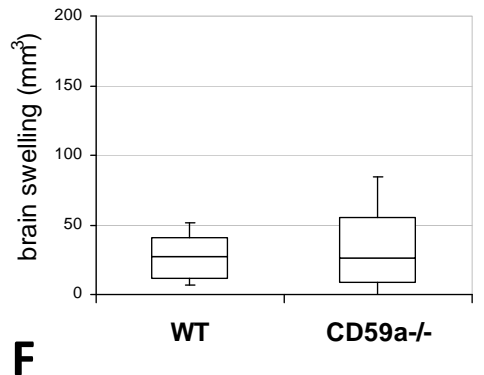

\*  $p > 0.05$

Supplement: MOESM2 [file 9601036]
